# Supplementary material
Source: MDPI journal article supplement (https://www.mdpi.com/2410-3888/7/1/35)
Supplement: s1 [file s1]

A.dabryanus MAGNRDKASDQMKWKENRGCRADLTSTGCGVGVGDKLNSITAGRGPLLVQDVFTDEMAHFDREIRIPERVVHAKGAGAFGYEVTHD 90  
A.ruthenus MAGNRDKASDQMKWKENRGCRADLTSTGCGVGVGDKLNSITAGRGPLLVQDVFTDEMAHFDREIRIPERVVHAKGAGAFGYEVTHD 90  
L.oculatus MAESRREKSDQMKWKESRGSKAEELITGCGVGVGDKLNACTAGRGPLLVQDVFTDEMAHFDREIRIPERVVHAKGAGAFGYEVTHD 90  
P.senegalus MADSRDKASDQMKWKESRGSKAEELITGCGVGVGDKLNACTAGRGPLLVQDVFTDEMAHFDREIRIPERVVHAKGAGAFGYEVTHD 90  
E.calabarius MYDTRNADSDQMKWKESRGSKAEELITGCGVGVGDKLNACTAGRGPLLVQDVFTDEMAHFDREIRIPERVVHAKGAGAFGYEVTHD 90  
C.orientalis MAESRREKSDQMKWKESRGSKAEELITGCGVGVGDKLNACTAGRGPLLVQDVFTDEMAHFDREIRIPERVVHAKGAGAFGYEVTHD 90  
M.cyprinoides MADNRDKASDQMKWKESRGSKAEELITGCGVGVGDKLNACTAGRGPLLVQDVFTDEMAHFDREIRIPERVVHAKGAGAFGYEVTHD 90  
D.clupeioides MAENRDKASDQMKWKESRGSKAEELITGCGVGVGDKLNACTAGRGPLLVQDVFTDEMAHFDREIRIPERVVHAKGAGAFGYEVTHD 90  
A.anguilla MYENRDKASDQMKWKESRGSKAEELITGCGVGVGDKLNACTAGRGPLLVQDVFTDEMAHFDREIRIPERVVHAKGAGAFGYEVTHD 90  
L.peru MAENRDKASDQMKWKESRGSKAEELITGCGVGVGDKLNACTAGRGPLLVQDVFTDEMAHFDREIRIPERVVHAKGAGAFGYEVTHD 90  
A.centarchus MADNRDKASDQMKWKESRGSKAEELITGCGVGVGDKLNACTAGRGPLLVQDVFTDEMAHFDREIRIPERVVHAKGAGAFGYEVTHD 90  
D.rerio MADNRDKASDQMKWKESRGSKAEELITGCGVGVGDKLNACTAGRGPLLVQDVFTDEMAHFDREIRIPERVVHAKGAGAFGYEVTHD 90  
H.sapiens MADNRDKASDQMKWKESRGSKAEELITGCGVGVGDKLNACTAGRGPLLVQDVFTDEMAHFDREIRIPERVVHAKGAGAFGYEVTHD 90  
M.musculus MYSDSRDKASDQMKWKESRGSKAEELITGCGVGVGDKLNACTAGRGPLLVQDVFTDEMAHFDREIRIPERVVHAKGAGAFGYEVTHD 90  
Consensus m r dqm w r q l tg g p dkin t g rgpllvqdv ftde mahfdreripervvhakgagafgy evthd

A.dabryanus ITKTKAKFEBHVGKRTPTAARFSTVAGPSSGSDTVRDRPGFAKRYTEEGNWDLGNNPIFFIRDEILFSPFHSHQKRNFTTHKDPD 180  
A.ruthenus ITKTKAKFEBHVGKRTPTAARFSTVAGPSSGSDTVRDRPGFAKRYTEEGNWDLGNNPIFFIRDEILFSPFHSHQKRNFTTHKDPD 180  
L.oculatus ITKTKAKFEBHVGKRTPTAARFSTVAGPSSGSDTVRDRPGFAKRYTEEGNWDLGNNPIFFIRDEILFSPFHSHQKRNFTTHKDPD 180  
P.senegalus ITKTKAKFEBHVGKRTPTAARFSTVAGPSSGSDTVRDRPGFAKRYTEEGNWDLGNNPIFFIRDEILFSPFHSHQKRNFTTHKDPD 180  
E.calabarius ITKTKAKFEBHVGKRTPTAARFSTVAGPSSGSDTVRDRPGFAKRYTEEGNWDLGNNPIFFIRDEILFSPFHSHQKRNFTTHKDPD 180  
C.orientalis ITKTKAKFEBHVGKRTPTAARFSTVAGPSSGSDTVRDRPGFAKRYTEEGNWDLGNNPIFFIRDEILFSPFHSHQKRNFTTHKDPD 180  
M.cyprinoides ITKTKAKFEBHVGKRTPTAARFSTVAGPSSGSDTVRDRPGFAKRYTEEGNWDLGNNPIFFIRDEILFSPFHSHQKRNFTTHKDPD 180  
D.clupeioides ITKTKAKFEBHVGKRTPTAARFSTVAGPSSGSDTVRDRPGFAKRYTEEGNWDLGNNPIFFIRDEILFSPFHSHQKRNFTTHKDPD 180  
A.anguilla ITKTKAKFEBHVGKRTPTAARFSTVAGPSSGSDTVRDRPGFAKRYTEEGNWDLGNNPIFFIRDEILFSPFHSHQKRNFTTHKDPD 180  
L.peru ITKTKAKFEBHVGKRTPTAARFSTVAGPSSGSDTVRDRPGFAKRYTEEGNWDLGNNPIFFIRDEILFSPFHSHQKRNFTTHKDPD 180  
A.centarchus ITKTKAKFEBHVGKRTPTAARFSTVAGPSSGSDTVRDRPGFAKRYTEEGNWDLGNNPIFFIRDEILFSPFHSHQKRNFTTHKDPD 180  
D.rerio ITKTKAKFEBHVGKRTPTAARFSTVAGPSSGSDTVRDRPGFAKRYTEEGNWDLGNNPIFFIRDEILFSPFHSHQKRNFTTHKDPD 180  
H.sapiens ITKTKAKFEBHVGKRTPTAARFSTVAGPSSGSDTVRDRPGFAKRYTEEGNWDLGNNPIFFIRDEILFSPFHSHQKRNFTTHKDPD 180  
M.musculus ITKTKAKFEBHVGKRTPTAARFSTVAGPSSGSDTVRDRPGFAKRYTEEGNWDLGNNPIFFIRDEILFSPFHSHQKRNFTTHKDPD 180  
Consensus kak f h g k t p a r f s t v a g p s s g s d t v r d r p g f a k r y t e e g n w d l g n n p i f f i r d e i l f s p f h s h q k r n f t t h k d p d

A.dabryanus MVWDFWLRPESLHQVFLFSDRGPIGGRHMGYGSHTFKLVNNAACEAVYCKFKHTGGIKNIPVDESSLSATNPDYSKODIYATA 270  
A.ruthenus MVWDFWLRPESLHQVFLFSDRGPIGGRHMGYGSHTFKLVNNAACEAVYCKFKHTGGIKNIPVDESSLSATNPDYSKODIYATA 270  
L.oculatus MVWDFWLRPESLHQVFLFSDRGPIGGRHMGYGSHTFKLVNNAACEAVYCKFKHTGGIKNIPVDESSLSATNPDYSKODIYATA 270  
P.senegalus MVWDFWLRPESLHQVFLFSDRGPIGGRHMGYGSHTFKLVNNAACEAVYCKFKHTGGIKNIPVDESSLSATNPDYSKODIYATA 270  
E.calabarius MVWDFWLRPESLHQVFLFSDRGPIGGRHMGYGSHTFKLVNNAACEAVYCKFKHTGGIKNIPVDESSLSATNPDYSKODIYATA 270  
C.orientalis MVWDFWLRPESLHQVFLFSDRGPIGGRHMGYGSHTFKLVNNAACEAVYCKFKHTGGIKNIPVDESSLSATNPDYSKODIYATA 270  
M.cyprinoides MVWDFWLRPESLHQVFLFSDRGPIGGRHMGYGSHTFKLVNNAACEAVYCKFKHTGGIKNIPVDESSLSATNPDYSKODIYATA 270  
D.clupeioides MVWDFWLRPESLHQVFLFSDRGPIGGRHMGYGSHTFKLVNNAACEAVYCKFKHTGGIKNIPVDESSLSATNPDYSKODIYATA 270  
A.anguilla MVWDFWLRPESLHQVFLFSDRGPIGGRHMGYGSHTFKLVNNAACEAVYCKFKHTGGIKNIPVDESSLSATNPDYSKODIYATA 270  
L.peru MVWDFWLRPESLHQVFLFSDRGPIGGRHMGYGSHTFKLVNNAACEAVYCKFKHTGGIKNIPVDESSLSATNPDYSKODIYATA 270  
A.centarchus MVWDFWLRPESLHQVFLFSDRGPIGGRHMGYGSHTFKLVNNAACEAVYCKFKHTGGIKNIPVDESSLSATNPDYSKODIYATA 270  
D.rerio MVWDFWLRPESLHQVFLFSDRGPIGGRHMGYGSHTFKLVNNAACEAVYCKFKHTGGIKNIPVDESSLSATNPDYSKODIYATA 270  
H.sapiens MVWDFWLRPESLHQVFLFSDRGPIGGRHMGYGSHTFKLVNNAACEAVYCKFKHTGGIKNIPVDESSLSATNPDYSKODIYATA 270  
M.musculus MVWDFWLRPESLHQVFLFSDRGPIGGRHMGYGSHTFKLVNNAACEAVYCKFKHTGGIKNIPVDESSLSATNPDYSKODIYATA 270  
Consensus mvwdfwlrpeshqv flf s d r g p i g g r h m g y g s h t f k l v n n a a c e a v y c k f k h t g g i k n i p v d e s s l s a t n p d y s k o d i y a t a

A.dabryanus NGNYFWSVFIQVMTFECAGKERNPFDLTKWSEKDEPLIEGVLNLNENNYFEVEQAFDPSNMPPGDESPDMLOGRLFYYPD 360  
A.ruthenus NGNYFWSVFIQVMTFECAGKERNPFDLTKWSEKDEPLIEGVLNLNENNYFEVEQAFDPSNMPPGDESPDMLOGRLFYYPD 360  
L.oculatus NGNYFWSVFIQVMTFECAGKERNPFDLTKWSEKDEPLIEGVLNLNENNYFEVEQAFDPSNMPPGDESPDMLOGRLFYYPD 360  
P.senegalus SGSVFWSVFIQVMTFECAGKERNPFDLTKWSEKDEPLIEGVLNLNENNYFEVEQAFDPSNMPPGDESPDMLOGRLFYYPD 360  
E.calabarius RGSVFWSVFIQVMTFECAGKERNPFDLTKWSEKDEPLIEGVLNLNENNYFEVEQAFDPSNMPPGDESPDMLOGRLFYYPD 360  
C.orientalis NGNYFWSVFIQVMTFECAGKERNPFDLTKWSEKDEPLIEGVLNLNENNYFEVEQAFDPSNMPPGDESPDMLOGRLFYYPD 360  
M.cyprinoides NGNYFWSVFIQVMTFECAGKERNPFDLTKWSEKDEPLIEGVLNLNENNYFEVEQAFDPSNMPPGDESPDMLOGRLFYYPD 360  
D.clupeioides YNNFWSVFIQVMTFECAGKERNPFDLTKWSEKDEPLIEGVLNLNENNYFEVEQAFDPSNMPPGDESPDMLOGRLFYYPD 360  
A.anguilla NGNYFWSVFIQVMTFECAGKERNPFDLTKWSEKDEPLIEGVLNLNENNYFEVEQAFDPSNMPPGDESPDMLOGRLFYYPD 360  
L.peru NGNYFWSVFIQVMTFECAGKERNPFDLTKWSEKDEPLIEGVLNLNENNYFEVEQAFDPSNMPPGDESPDMLOGRLFYYPD 360  
A.centarchus NGNYFWSVFIQVMTFECAGKERNPFDLTKWSEKDEPLIEGVLNLNENNYFEVEQAFDPSNMPPGDESPDMLOGRLFYYPD 360  
D.rerio NGNYFWSVFIQVMTFECAGKERNPFDLTKWSEKDEPLIEGVLNLNENNYFEVEQAFDPSNMPPGDESPDMLOGRLFYYPD 360  
H.sapiens TGRVFSVFIQVMTFECAGKERNPFDLTKWSEKDEPLIEGVLNLNENNYFEVEQAFDPSNMPPGDESPDMLOGRLFYYPD 360  
M.musculus NGNYFWSVFIQVMTFECAGKERNPFDLTKWSEKDEPLIEGVLNLNENNYFEVEQAFDPSNMPPGDESPDMLOGRLFYYPD 360  
Consensus p w i q v m t f e c a g k e r n p f d l t k w s e k d e p l i e g v l n l n e n n y f e v e q a f d p s n m p p g d e s p d m l o g r l f y y p d

A.dabryanus THRRRLG-NYLQLEVNCFKRRV-NYQRDGPMMC-FNQGGAPNYPNSFAEETQCFBTKFKVSALVRRNSSDINVOVRFEYTCV 450  
A.ruthenus THRRRLG-NYLQLEVNCFKRRV-NYQRDGPMMC-FNQGGAPNYPNSFAEETQCFBTKFKVSALVRRNSSDINVOVRFEYTCV 450  
L.oculatus THRRRLG-NYLQLEVNCFKRRV-NYQRDGPMMC-FNQGGAPNYPNSFAEETQCFBTKFKVSALVRRNSSDINVOVRFEYTCV 450  
P.senegalus THRRRLG-NYLQLEVNCFKRRV-NYQRDGPMMC-FNQGGAPNYPNSFAEETQCFBTKFKVSALVRRNSSDINVOVRFEYTCV 450  
E.calabarius THRRRLG-NYLQLEVNCFKRRV-NYQRDGPMMC-FNQGGAPNYPNSFAEETQCFBTKFKVSALVRRNSSDINVOVRFEYTCV 450  
C.orientalis THRRRLG-NYLQLEVNCFKRRV-NYQRDGPMMC-FNQGGAPNYPNSFAEETQCFBTKFKVSALVRRNSSDINVOVRFEYTCV 450  
M.cyprinoides THRRRLG-NYLQLEVNCFKRRV-NYQRDGPMMC-FNQGGAPNYPNSFAEETQCFBTKFKVSALVRRNSSDINVOVRFEYTCV 450  
D.clupeioides THRRRLG-NYLQLEVNCFKRRV-NYQRDGPMMC-FNQGGAPNYPNSFAEETQCFBTKFKVSALVRRNSSDINVOVRFEYTCV 450  
A.anguilla THRRRLG-NYLQLEVNCFKRRV-NYQRDGPMMC-FNQGGAPNYPNSFAEETQCFBTKFKVSALVRRNSSDINVOVRFEYTCV 450  
L.peru THRRRLG-NYLQLEVNCFKRRV-NYQRDGPMMC-FNQGGAPNYPNSFAEETQCFBTKFKVSALVRRNSSDINVOVRFEYTCV 450  
A.centarchus THRRRLG-NYLQLEVNCFKRRV-NYQRDGPMMC-FNQGGAPNYPNSFAEETQCFBTKFKVSALVRRNSSDINVOVRFEYTCV 450  
D.rerio THRRRLG-NYLQLEVNCFKRRV-NYQRDGPMMC-FNQGGAPNYPNSFAEETQCFBTKFKVSALVRRNSSDINVOVRFEYTCV 450  
H.sapiens THRRRLG-NYLQLEVNCFKRRV-NYQRDGPMMC-FNQGGAPNYPNSFAEETQCFBTKFKVSALVRRNSSDINVOVRFEYTCV 450  
M.musculus THRRRLG-NYLQLEVNCFKRRV-NYQRDGPMMC-FNQGGAPNYPNSFAEETQCFBTKFKVSALVRRNSSDINVOVRFEYTCV 450  
Consensus thrhrlg nyl q l e v n c f k r r v n y q r d g p m m c f n q g g a p n y p n s f a e e t q c f b t k f k v s a l v r r n s s d i n v o v r f e y t c v

A.dabryanus LNEDEERCLQCNAG-LKCAQFIQKRAVENEMDVHEDYGSRIQALIDKNATQAG.ENV.IRTNAPTAAASLTARE.SKM 526  
A.ruthenus LNEDEERCLQCNAG-LKCAQFIQKRAVENEMDVHEDYGSRIQALIDKNATQAG.ENV.IRTNAPTAAASLTARE.SKM 526  
L.oculatus LNEDEERCLQCNAG-LKCAQFIQKRAVENEMDVHEDYGSRIQALIDKNATQAG.ENV.IRTNAPTAAASLTARE.SKM 524  
P.senegalus LNEDEERCLQCNAG-LKCAQFIQKRAVENEMDVHEDYGSRIQALIDKNATQAG.ENV.IRTNAPTAAASLTARE.SKM 525  
E.calabarius LNEDEERCLQCNAG-LKCAQFIQKRAVENEMDVHEDYGSRIQALIDKNATQAG.ENV.IRTNAPTAAASLTARE.SKM 525  
C.orientalis LNEDEERCLQCNAG-LKCAQFIQKRAVENEMDVHEDYGSRIQALIDKNATQAG.ENV.IRTNAPTAAASLTARE.SKM 529  
M.cyprinoides LNEDEERCLQCNAG-LKCAQFIQKRAVENEMDVHEDYGSRIQALIDKNATQAG.ENV.IRTNAPTAAASLTARE.SKM 526  
D.clupeioides LNEDEERCLQCNAG-LKCAQFIQKRAVENEMDVHEDYGSRIQALIDKNATQAG.ENV.IRTNAPTAAASLTARE.SKM 526  
A.anguilla LNEDEERCLQCNAG-LKCAQFIQKRAVENEMDVHEDYGSRIQALIDKNATQAG.ENV.IRTNAPTAAASLTARE.SKM 526  
L.peru LNEDEERCLQCNAG-LKCAQFIQKRAVENEMDVHEDYGSRIQALIDKNATQAG.ENV.IRTNAPTAAASLTARE.SKM 527  
A.centarchus LNEDEERCLQCNAG-LKCAQFIQKRAVENEMDVHEDYGSRIQALIDKNATQAG.ENV.IRTNAPTAAASLTARE.SKM 527  
D.rerio LNEDEERCLQCNAG-LKCAQFIQKRAVENEMDVHEDYGSRIQALIDKNATQAG.ENV.IRTNAPTAAASLTARE.SKM 526  
H.sapiens LNEDEERCLQCNAG-LKCAQFIQKRAVENEMDVHEDYGSRIQALIDKNATQAG.ENV.IRTNAPTAAASLTARE.SKM 527  
M.musculus LNEDEERCLQCNAG-LKCAQFIQKRAVENEMDVHEDYGSRIQALIDKNATQAG.ENV.IRTNAPTAAASLTARE.SKM 527  
Consensus l e r n l c n a g l k a q f i q k r a v e n e m d v h e d y g s r i q a l i d k n a t q a g . e n v . i r t n a p t a a s l t a r e . s k m

**Figure S1.** Alignment of the full amino acid sequences of *AdCAT* with its homologs from other species. The catalase proximal active-site signature domain is marked by red box, the catalase proximal heme-ligand signature domain is marked by blue box, the N-glycosylation site and the peroxisome targeting signal are shaded in yellow and green, respectively.

**Table S1.** Nutrients content of diets.

| Ingredients       | Contents (%) |
|-------------------|--------------|
| Amino acid        |              |
| Aspartic acid     | 3.87         |
| Threonine         | 1.52         |
| Serine            | 1.75         |
| Glutamic acid     | 6.37         |
| Glycine           | 2.20         |
| Alanine           | 2.32         |
| Valine            | 2.19         |
| Methionine        | 0.68         |
| Isoleucine        | 1.58         |
| Leucine           | 3.42         |
| Tyrosine          | 1.28         |
| Phenylalanine     | 1.97         |
| Lysine            | 2.48         |
| Hlstdine          | 1.17         |
| Arginine          | 2.41         |
| Proline           | 2.12         |
| Total amino acids | 37.33        |
| Nutrients content |              |
| Crude protein     | 41.31        |
| Crude lipid       | 10.00        |
| Ash               | 13.51        |
| Moisture          | 9.14         |

**Table S2.** List of AdCu/Zn-SOD sequences used in this study. Amino acid identities (%) of Cu/Zn-SOD proteins from other species with AdCu/Zn-SOD.

| Species                       | Protein ID     | Identity (%) with AdCu/Zn-SOD |
|-------------------------------|----------------|-------------------------------|
| <i>Acipenser ruthenus</i>     | RXM97503.1     | 98.06                         |
| <i>Salvelinus alpinus</i>     | XP_023998922.1 | 81.17                         |
| <i>Lepisosteus oculatus</i>   | XP_006628266.1 | 81.17                         |
| <i>Salvelinus namaycush</i>   | XP_038860929.1 | 80.52                         |
| <i>Pungitius pungitius</i>    | XP_037322998.1 | 79.87                         |
| <i>Megalops cyprinoides</i>   | XP_036379360.1 | 79.22                         |
| <i>Anguilla marmorata</i>     | AKN46051.1     | 79.22                         |
| <i>Channa striata</i>         | CCQ48610.1     | 79.22                         |
| <i>Scophthalmus maximus</i>   | XP_035480522.1 | 79.22                         |
| <i>Chanos chanos</i>          | XP_030648381.1 | 79.22                         |
| <i>Cynoglossus semilaevis</i> | XP_008331462.1 | 78.57                         |
| <i>Danio rerio</i>            | NP_571369.1    | 77.27                         |
| <i>Oncorhynchus mykiss</i>    | NP_001117801.1 | 77.27                         |
| <i>Salmo salar</i>            | NP_001117059.1 | 75.97                         |
| <i>Ictalurus punctatus</i>    | NP_001187921.1 | 75.66                         |
| <i>Oryzias latipes</i>        | XP_004076261.1 | 74.68                         |
| <i>Mus musculus</i>           | NP_035564.1    | 71.43                         |
| <i>Homo sapiens</i>           | NP_000445.1    | 68.83                         |
| <i>Sus scrofa</i>             | NP_001177351.1 | 66.88                         |
| <i>Gallus gallus</i>          | NP_990395.1    | 66.01                         |

**Table S3.** List of AdCAT sequences used in this study. Amino acid identities (%) of CAT proteins from other species with AdCAT.

| Species                          | Protein ID     | Identity (%) with AdCAT |
|----------------------------------|----------------|-------------------------|
| <i>Acipenser ruthenus</i>        | XP_033910111.2 | 98.10                   |
| <i>Lepisosteus oculatus</i>      | XP_006642501.1 | 85.93                   |
| <i>Polypterus senegalus</i>      | XP_039600263.1 | 84.41                   |
| <i>Cynops orientalis</i>         | AIR07783.1     | 84.19                   |
| <i>Cynops orientalis</i>         | AIR07783.1     | 84.19                   |
| <i>Erpetoichthys calabaricus</i> | XP_028649340.1 | 84.03                   |
| <i>Lutjanus peru</i>             | ANS56707.1     | 83.11                   |
| <i>Archocentrus centrarchus</i>  | XP_030586949.1 | 82.92                   |
| <i>Denticeps clupeoides</i>      | XP_028842031.1 | 82.89                   |
| <i>Danio rerio</i>               | AAH51626.1     | 82.89                   |
| <i>Denticeps clupeoides</i>      | XP_028842031.1 | 82.89                   |
| <i>Anguilla anguilla</i>         | XP_035250822.1 | 82.51                   |
| <i>Megalops cyprinoides</i>      | XP_036390602.1 | 82.32                   |
| <i>Sparus aurata</i>             | XP_030281034.1 | 82.16                   |
| <i>Sander lucioperca</i>         | XP_031172608.1 | 81.97                   |
| <i>Oryzias latipes</i>           | XP_004069508.1 | 81.40                   |
| <i>Sus scrofa</i>                | NP_999466.2    | 81.07                   |
| <i>Mus musculus</i>              | NP_033934.2_1  | 80.84                   |
| <i>Ictalurus punctatus</i>       | XP_017341362.1 | 80.04                   |
| <i>Homo sapiens</i>              | AAK29181.1     | 79.92                   |
| <i>Gallus gallus</i>             | NP_001026386.2 | 79.20                   |
